# Supplementary material for: Photochemical fabrication of defect-abundant Pd/SnO2 with promoted performance for dioctyl phthalate gas sensing
Source: Royal Society of Chemistry journal article supplement (doi:10.1039/d3nj00578j), 2023-01-01
Supplement: d3nj00578j1.pdf [file d3nj00578j1.pdf]

## Supporting information

### **Photochemical fabrication of defects abundant Pd/SnO<sub>2</sub> with promoted performance for dioctyl phthalate gas sensor**

*Yue Fu<sup>a,b</sup>, Chaozhong Li<sup>a\*</sup>, Xue Chen<sup>a</sup>, Yidan Liu<sup>b</sup>, Haocheng Wu<sup>b</sup>, Rongrong Jia<sup>b</sup>, Liyi Shi<sup>b,c</sup>,*

*Dongqi Yu<sup>a\*</sup> and Lei Huang<sup>b\*</sup>*

<sup>a</sup> School of Physics and Electronic Technology, Liaoning Normal University, Dalian 116029, China.

<sup>b</sup> Research Center of Nano Science and Technology, Shanghai University, Shanghai 200444, P. R. China.

<sup>c</sup> Emerging Industries Institute, Shanghai University, Jiaxing, Zhejiang 314006, P. R. China

\*Corresponding authors. Fax: +86-21-66134726; Tel: +86-21-66134726.

E-mail addresses: useeu@163.com (D. Yu), leihuang@shu.edu.cn (L. Huang)

## Supporting Tables

**Table S1.** The profiles of different materials.

| Sample                  | BET surface<br>area (m <sup>2</sup> /g) | Pore<br>volume (cm <sup>3</sup> /g) | Pore size (nm) |
|-------------------------|-----------------------------------------|-------------------------------------|----------------|
| SnO <sub>2</sub>        | 40.7                                    | 0.01                                | 6.5            |
| 5%Pd/SnO <sub>2</sub>   | 8.2                                     | 0.01                                | 14.5           |
| 7.5%Pd/SnO <sub>2</sub> | 8.3                                     | 0.02                                | 15.2           |

**Table S2.** Designed loading amount and the estimated numbers by ICP-MS.

| <b>Sample</b>           | <b>Designed loading</b> | <b>Actual loading by ICP-MS</b> |
|-------------------------|-------------------------|---------------------------------|
| 3%Pd/SnO <sub>2</sub>   | 3%                      | 2.61%                           |
| 5%Pd/SnO <sub>2</sub>   | 5%                      | 4.53%                           |
| 7.5%Pd/SnO <sub>2</sub> | 7.5%                    | 5.61%                           |
| 10%Pd/SnO <sub>2</sub>  | 10%                     | 7.34%                           |

## Supporting Figures

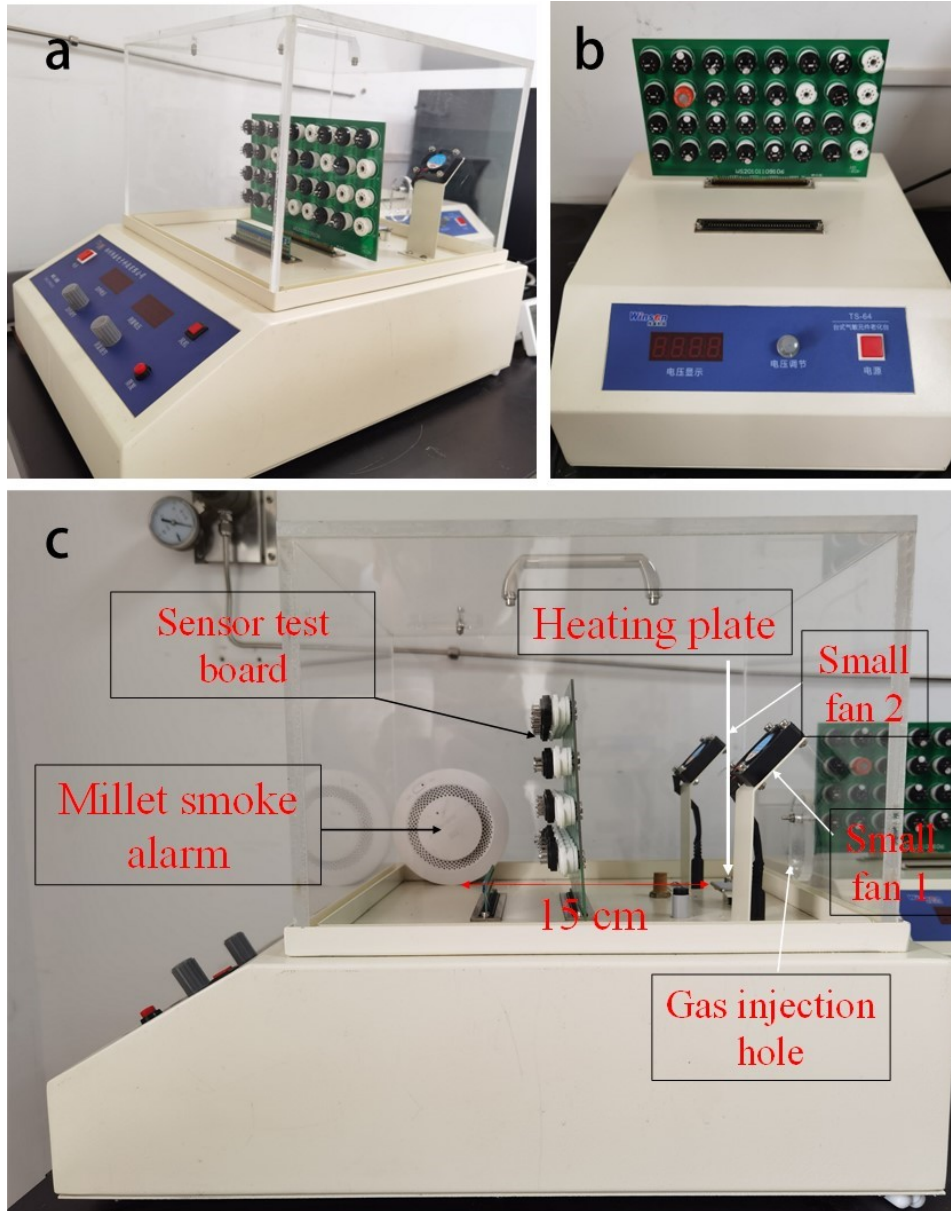

**Fig. S1** The photos of (a) the sensing test setup; (b) the TS-64 table-top gas sensor aging platform; (c) the millet smoke alarm placement.

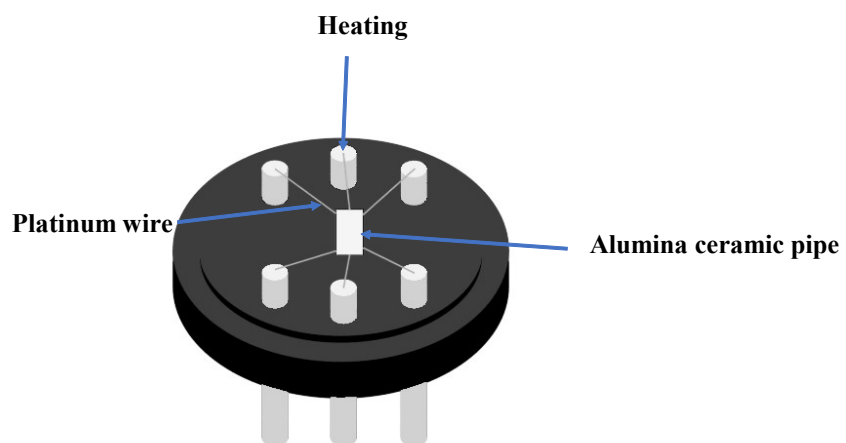

**Fig. S2** Diagrammatic sketch of ceramic tube sensor device.

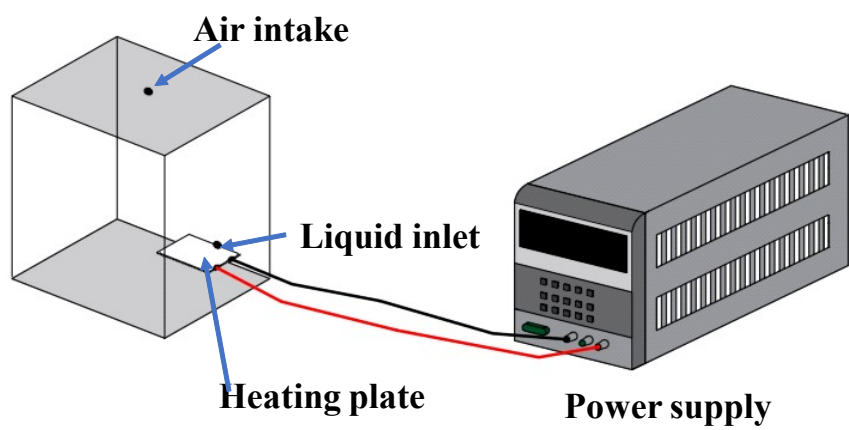

Fig. S3 DOP vapor generator.

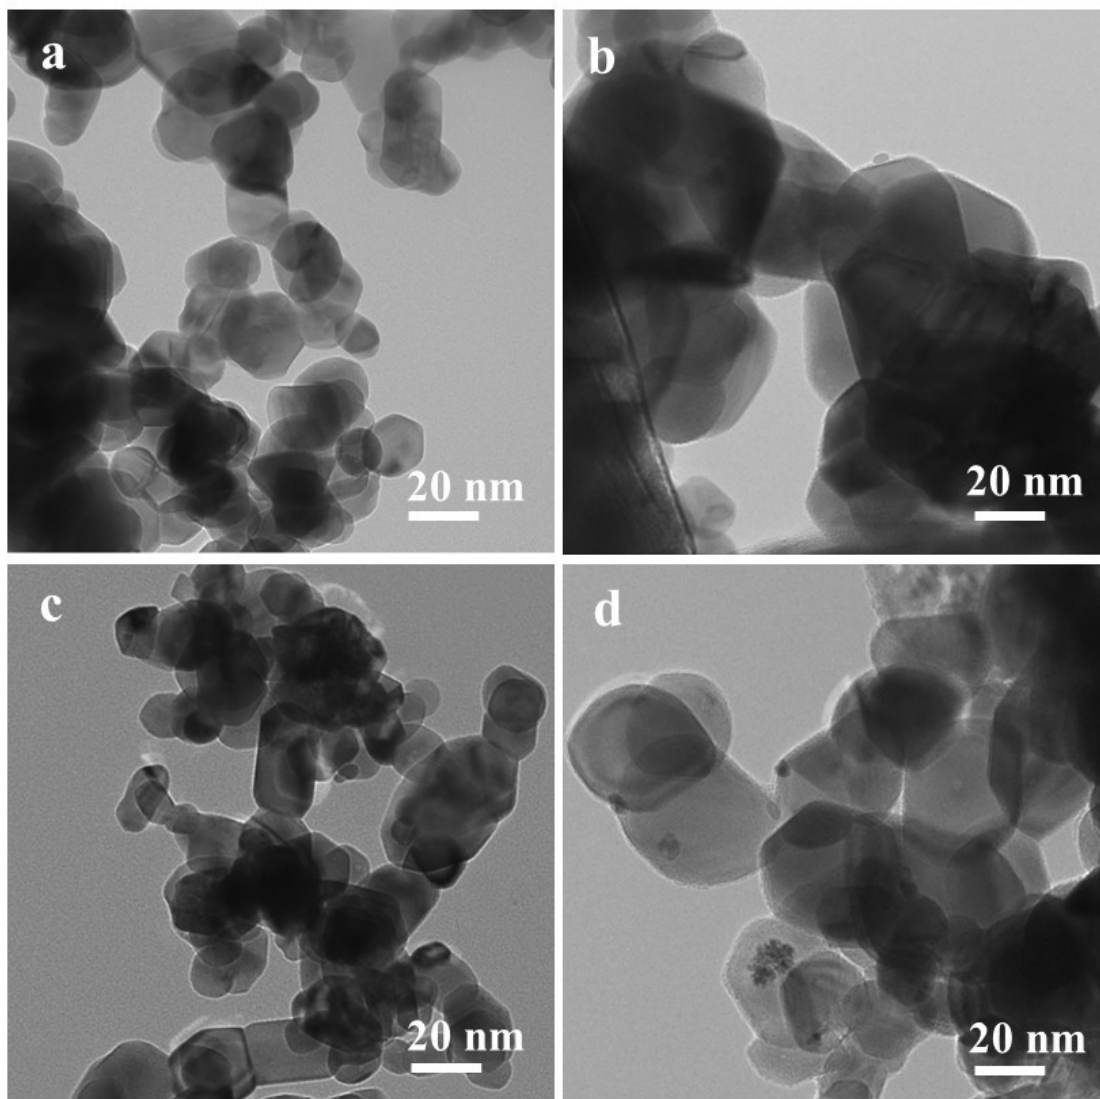

**Fig. S4** TEM image of (a) pure SnO<sub>2</sub>; (b) 3 % Pd/SnO<sub>2</sub>; (c) 7.5 % Pd/SnO<sub>2</sub>; (d) 10 % Pd/SnO<sub>2</sub>.

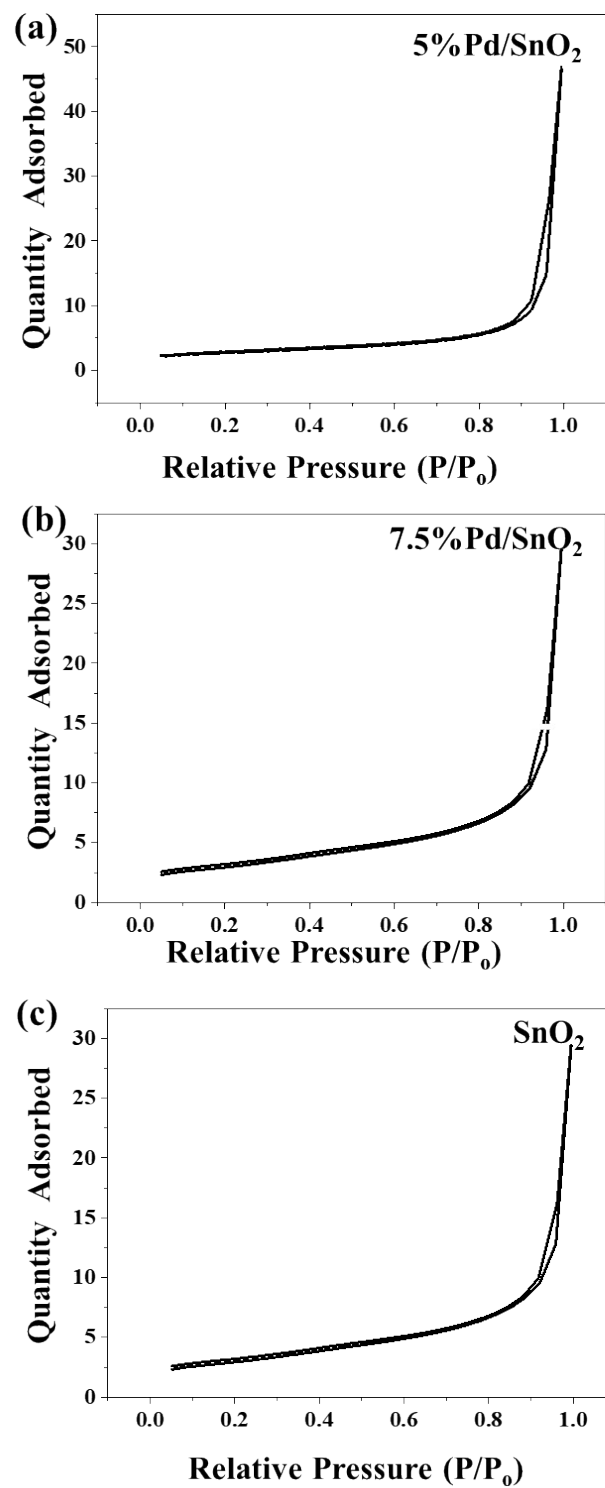

Fig. S5 N<sub>2</sub> adsorption-desorption isotherms curves of different samples.



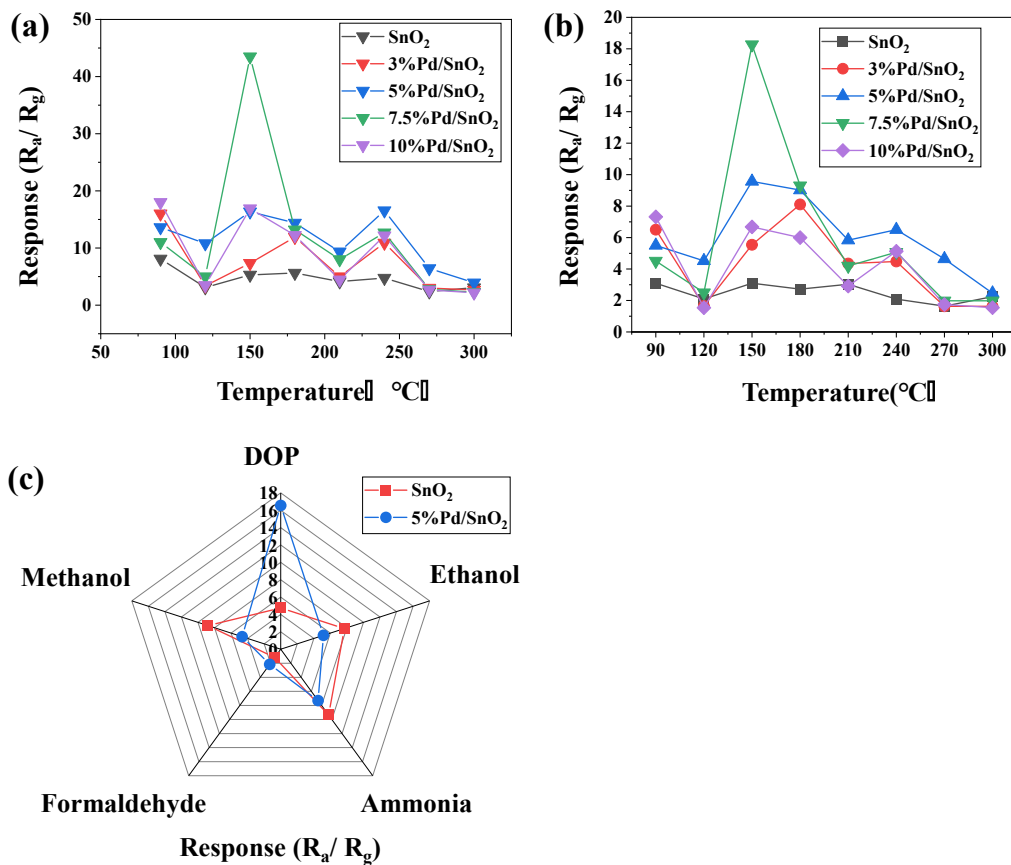

**Fig. S6** The response of DOP with the concentration of (a) 25 ppm and (b) 10 ppm at different temperatures. (c) The selectivity of different gases at 25 ppm.

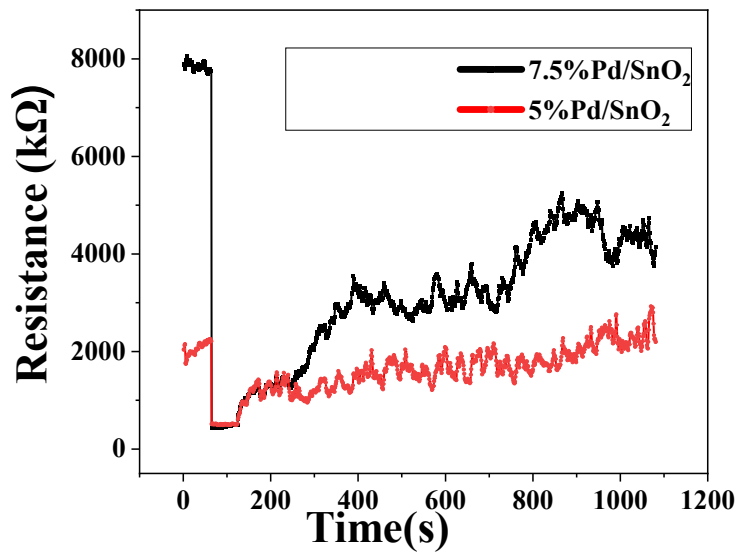

Fig. S7 5%Pd/SnO<sub>2</sub> and 7.5%Pd/SnO<sub>2</sub> response-recovery curves to 10 ppm DOP at 150 °C.

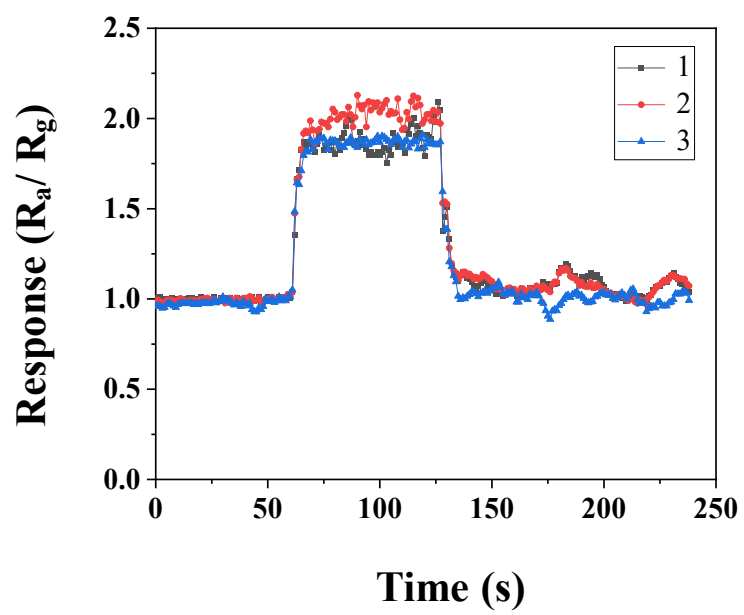

Fig. S8 Repeatability of sensors in different batches at 240 °C.

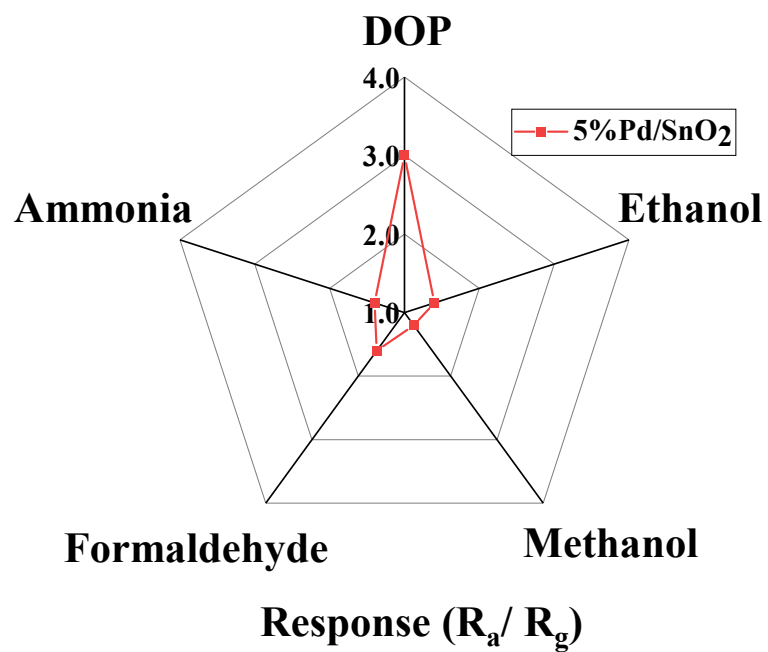

**Fig. S9** The selectivity of 5 % Pd/SnO<sub>2</sub> towards five gases (formaldehyde, ammonia, ethanol, methanol and DOP, 5 ppm) at a test temperature of 240 °C and an ambient humidity of 70 % RH.

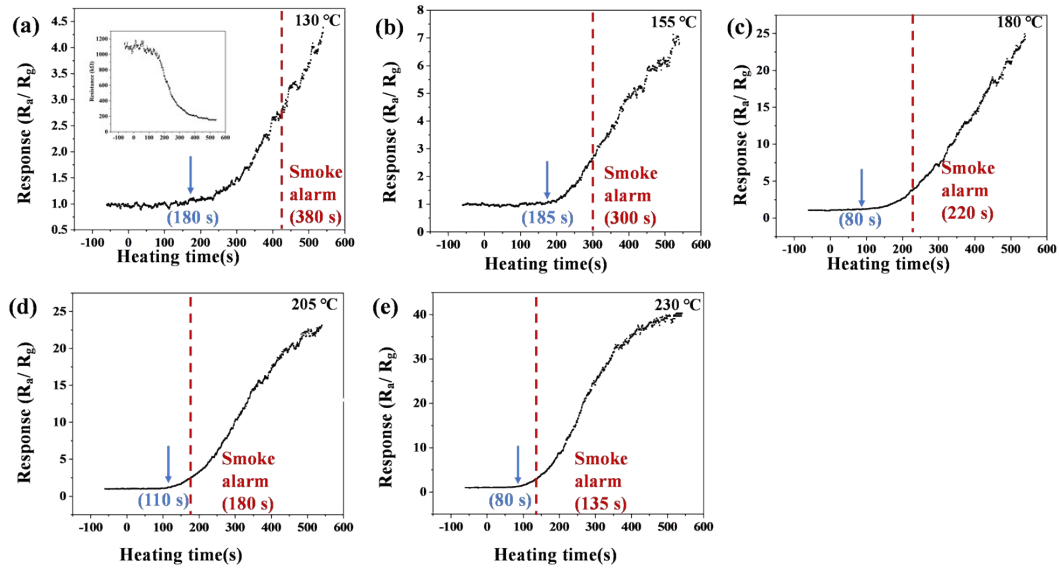

**Fig. S10** Comparison of response signals between 5%Pd/SnO<sub>2</sub> gas sensor (worked at 150 °C) and commercial smoke detector at different PVC cable heating temperatures: (a) 130 °C, (b) 155 °C, (c) 180 °C, (d) 205 °C and (e) 230 °C.
